# Supplementary material for: Reliable thin-film encapsulation of flexible OLEDs and enhancing their bending characteristics through mechanical analysis
Source: Royal Society of Chemistry journal article supplement (doi:10.1039/c6ra06571f), 2016-01-01
Supplement: c6ra06571f1.pdf [file c6ra06571f1.pdf]

## Electronic Supplementary Information

### Reliable thin-film encapsulation of flexible OLEDs and enhancing their bending characteristics through mechanical analysis

**Yun Cheol Han<sup>a</sup>, Eun Gyo Jeong<sup>a</sup>, Hyuncheol Kim<sup>a</sup>, Seonil Kwon<sup>a</sup>, Hyeon-Gyun Im<sup>b</sup>, Byeong-Soo Bae<sup>b</sup>, and Kyung Cheol Choi<sup>\*a</sup>**

<sup>a</sup>School of Electrical Engineering, Korea Advanced Institute of Science and Technology (KAIST), 291 Daehak-ro, Yuseong-gu, Daejeon 305-701, Republic of Korea. E-mail: kyungcc@kaist.ac.kr

<sup>b</sup>Department of Materials Science and Engineering, Korea Advanced Institute of Science and Technology (KAIST), 291 Daehak-ro, Yuseong-gu, Daejeon 305-701, Republic of Korea.

**Table 1.** Young's modulus and film thickness used in FEA of multi-layer structure

| Materials                      | Young's modulus (GPa) | Poisson's ratio | Thickness                         |
|--------------------------------|-----------------------|-----------------|-----------------------------------|
| Hybrimer                       | 4                     | 0.3             | Variable (0 ~ 200 $\mu\text{m}$ ) |
| S-H nanocomposite              | 4                     | 0.3             | 120 nm                            |
| Al <sub>2</sub> O <sub>3</sub> | 150                   | 0.22            | 30 nm                             |
| Al                             | 70                    | 0.36            | 100 nm                            |
| Alq <sub>3</sub>               | 2                     | 0.3             | 50 nm                             |
| NPB                            | 2                     | 0.3             | 50 nm                             |
| Ag                             | 85                    | 0.37            | 7 nm                              |
| ZnS                            | 128                   | 0.27            | 25 nm                             |
| PET                            | 3.2                   | 0.3             | 125 $\mu\text{m}$                 |

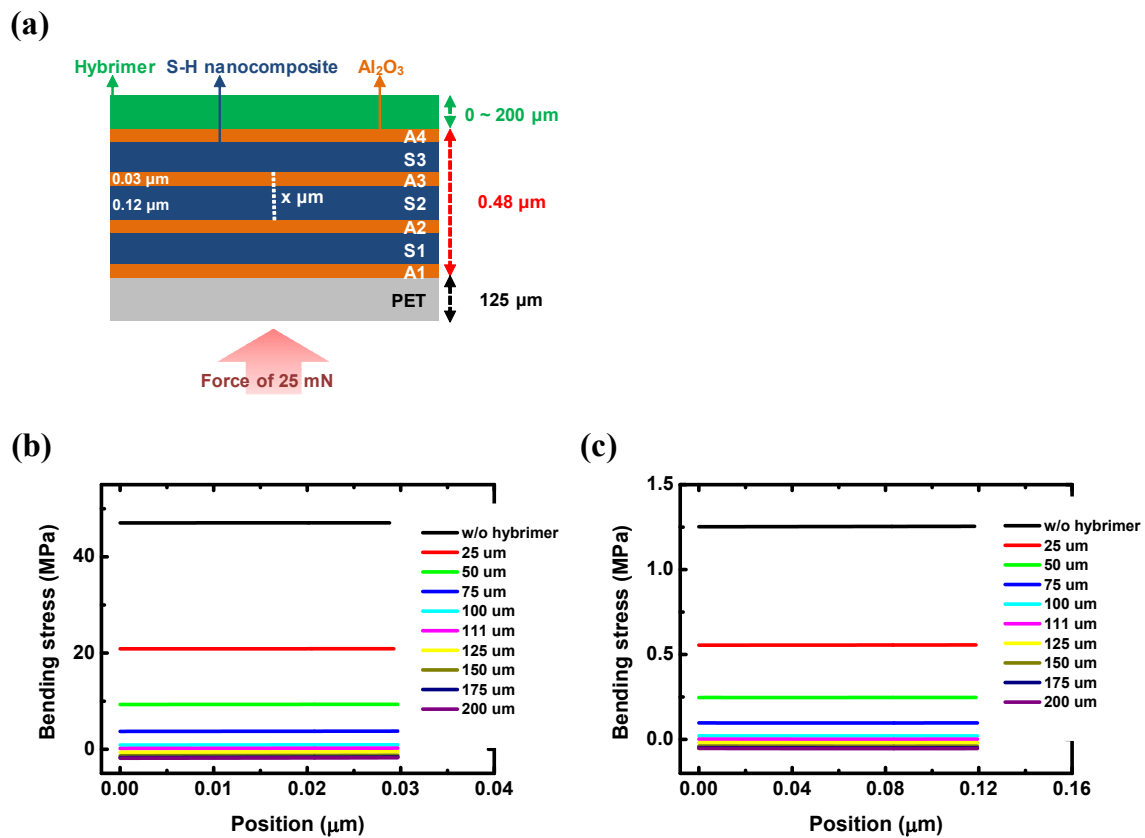

Fig. S1 (a) Schematic of moisture barrier structure on PET substrate. Bending stress distribution along the vertical dashed line of (b)  $\text{Al}_2\text{O}_3$  layer and (c) S-H nanocomposite layer. Each layer is indicated as A3 and S2, respectively. The bottom of each layer is used as a reference for the x-axis.

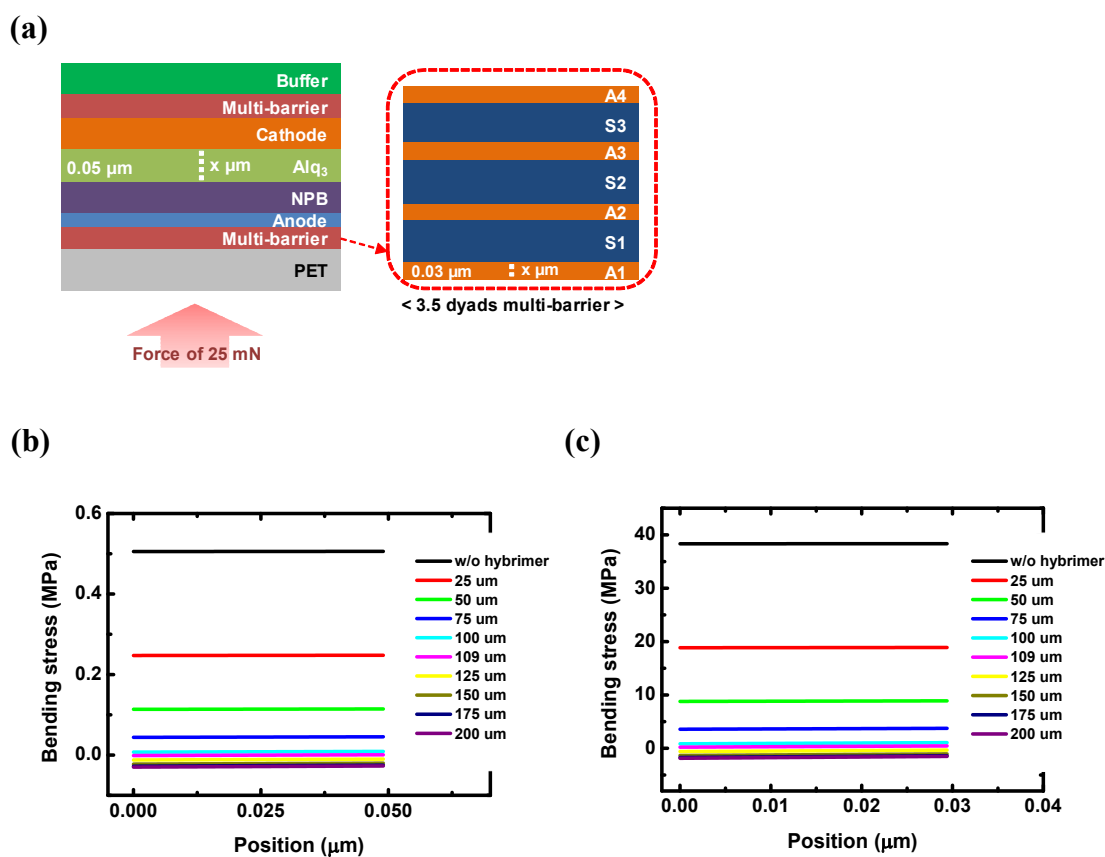

Fig. S2 (a) Schematic of encapsulated FOLEDs structure on PET substrate. Bending stress distribution along the vertical dashed line of (b)  $\text{Alq}_3$  layer and (c)  $\text{Al}_2\text{O}_3$  layer. The  $\text{Al}_2\text{O}_3$  layer is indicated as A1. The bottom of each layer is used as a reference for the x-axis.

Fig. S1 and Fig. S2 show the bending stress distribution of the moisture barrier and encapsulated FOLED structures, respectively. The bending stress was calculated along the white dashed line, which is positioned at the center of each layer. Even though the bending stress varied in relation to changes in the hybrimer thickness, the bending stress was linearly distributed over the corresponding layer thickness, regardless of the hybrimer thickness. As reference of certain thickness of hybrimer of 111  $\mu\text{m}$  for the moisture barrier and 109  $\mu\text{m}$  for the encapsulated FOLED structures, the bending stress type was converted between compressive and tensile stress.
